# Supplementary material for: Role of Microbiota in Strengthening Ocular Mucosal Barrier Function Through Secretory IgA
Source: PubMed Central journal article supplement — Invest Ophthalmol Vis Sci. 2017 Sep;58(11):4593–600. doi: 10.1167/iovs.17-22119 (PMC5595225; doi:10.1167/iovs.17-22119), 2017-09
Supplement: iovs-58-10-18_s01.pdf [file iovs-58-10-18_s01.pdf]

**Supplementary Table 1.** List of proteins with significant change in relative abundances in the eye wash samples from SPF SW and SPF C57BL6/N mice. Data are presented as fold differences in levels of SPF SW versus SPF C57BL6/N proteins and corresponding p-value.

| Gene name   | Protein names                                                      | (-)log10 (p-value) | Fold difference |
|-------------|--------------------------------------------------------------------|--------------------|-----------------|
| <b>Igha</b> | <b>Ig alpha chain C1 region</b>                                    | 1.76               | 6.56            |
|             | Uncharacterized protein C2orf47 homolog, mitochondrial             | 2.66               | 5.88            |
| Gm1330      |                                                                    | 2.19               | 5.81            |
| <b>Igha</b> | <b>Ig alpha chain C2 region</b>                                    | 1.13               | 4.55            |
| Calml1      | Calmodulin                                                         | 2.13               | 4.44            |
| Chn1        |                                                                    | 1.63               | 4.18            |
| Mpst        | 3-mercaptopyruvate sulfurtransferase                               | 0.83               | 4.07            |
| H2afx       | Histone H2AX                                                       | 0.96               | 3.95            |
| Igkc        | Ig kappa chain C region                                            | 0.88               | 3.91            |
| Mup1        | Major urinary protein 1                                            | 1.29               | 3.85            |
| Ctsz        | Cathepsin Z                                                        | 1.43               | 3.73            |
| Bglap       | Osteocalcin-related protein                                        | 1.48               | 3.71            |
| Ldhd        | L-lactate dehydrogenase B chain                                    | 2.39               | 3.64            |
| Isg15       | Ubiquitin-like protein ISG15                                       | 1.86               | 3.47            |
| Psmc2       | Proteasome subunit alpha type-2                                    | 2.53               | 3.45            |
| Ovos        | Ovostatin homolog                                                  | 1.46               | 3.45            |
| <b>Igj</b>  | <b>Immunoglobulin J chain</b>                                      | 0.88               | 3.43            |
| Lcn11       | Lipocalin                                                          | 1.08               | 3.33            |
| Ephx1       | Epoxide hydrolase 1                                                | 1.07               | 3.18            |
| Psmc1       | Proteasome subunit beta type-1                                     | 0.79               | 3.09            |
| Mia3        | Melanoma inhibitory activity protein 3                             | 2.44               | 3.08            |
| Trim16      | Tripartite motif-containing protein 16                             | 3.54               | 3.07            |
| Eps811      | Epidermal growth factor receptor kinase substrate 8-like protein 1 | 1.08               | 3.07            |
| Syne1       | Nesprin-1                                                          | 1.31               | 3.07            |
| Oxr1        | Oxidation resistance protein 1                                     | 0.94               | 3.06            |
| Lzic        | Protein LZIC                                                       | 2.19               | 3.04            |
| Xpnpep1     | Xaa-Pro aminopeptidase 1                                           | 0.99               | 2.99            |
| Capza1      | F-actin-capping protein subunit alpha-1                            | 1.85               | 2.99            |
| Spr         | Sepiapterin reductase                                              | 2.00               | 2.96            |
| Mug1        | Murinoglobulin-1                                                   | 0.84               | 2.93            |
| Rnf114      | E3 ubiquitin-protein ligase RNF114                                 | 1.51               | 2.93            |
| Sval3       |                                                                    | 1.02               | 2.86            |
| Lypla2      | Acyl-protein thioesterase 2                                        | 1.26               | 2.82            |

|           |                                                             |      |       |
|-----------|-------------------------------------------------------------|------|-------|
| Nars      | Asparagine--tRNA ligase, cytoplasmic                        | 1.88 | 2.75  |
| Apip      | Methylthioribulose-1-phosphate dehydratase                  | 2.00 | 2.74  |
| Mydgf     | UPF0556 protein C19orf10 homolog                            | 1.44 | 2.73  |
| Klk1b9    | Kallikrein 1-related peptidase b9                           | 1.80 | 2.64  |
| Ube2v1    | Ubiquitin-conjugating enzyme E2 variant 1                   | 0.98 | 2.62  |
| Rpl13a    | 60S ribosomal protein L13a                                  | 0.95 | 2.61  |
| Tmprss11g | Transmembrane protease serine 11G                           | 1.63 | 2.60  |
| Isoc1     | Isochorismatase domain-containing protein 1                 | 2.03 | 2.59  |
| Alpl      | Alkaline phosphatase, tissue-nonspecific isozyme            | 1.06 | 2.57  |
| Uso1      | General vesicular transport factor p115                     | 2.36 | 2.56  |
| Pafah1b3  | Platelet-activating factor acetylhydrolase IB subunit gamma | 1.60 | 2.56  |
| Slc3a2    | 4F2 cell-surface antigen heavy chain                        | 1.92 | 2.52  |
| Rps10     | 40S ribosomal protein S10                                   | 1.71 | 2.40  |
| Azgp1     | Zinc-alpha-2-glycoprotein                                   | 1.86 | 2.35  |
| Rps7      | 40S ribosomal protein S7                                    | 1.75 | 2.33  |
| Qdpr      | Dihydropteridine reductase                                  | 1.09 | 2.30  |
| Chmp5     | Charged multivesicular body protein 5                       | 1.76 | 2.30  |
| Grn       | Granulins                                                   | 1.88 | 2.28  |
| Hp1bp3    | Heterochromatin protein 1-binding protein 3                 | 1.33 | 2.27  |
| Prep      | Prolyl endopeptidase                                        | 1.22 | 2.25  |
| Ctsl      | Cathepsin L1                                                | 1.05 | 2.25  |
| Csrp1     | Cysteine and glycine-rich protein 1                         | 1.29 | 2.21  |
| Atp6v1a   | V-type proton ATPase catalytic subunit A                    | 1.42 | 2.21  |
| Rbmx      | RNA binding motif protein, X-linked-like-1                  | 1.27 | 2.16  |
| Smap      | Small acidic protein                                        | 1.59 | 2.07  |
| Nudt10    | Diphosphoinositol polyphosphate phosphohydrolase 2          | 1.25 | 2.06  |
| Hexb      | Beta-hexosaminidase subunit beta                            | 2.21 | 2.06  |
| Eif3i     | Eukaryotic translation initiation factor 3 subunit I        | 1.21 | 1.99  |
| F5        | Coagulation factor V                                        | 1.37 | 1.99  |
| Naprt     | Nicotinate phosphoribosyltransferase                        | 1.86 | 1.92  |
| Txndc12   | Thioredoxin domain-containing protein 12                    | 1.23 | 1.89  |
| Impa1     | Inositol monophosphatase 1                                  | 2.10 | 1.77  |
| Anxa6     | Annexin A6                                                  | 1.73 | 1.53  |
| Kars      | Lysine-tRNA ligase                                          | 3.21 | 1.35  |
| Rps27l    | 40S ribosomal protein S27-like                              | 2.55 | -1.66 |
| S100a8    | Protein S100-A8                                             | 3.99 | -2.16 |
| S100a9    | Protein S100-A9                                             | 1.10 | -2.22 |
| Scgb1b12  | Secretogloin 1b12                                           | 1.22 | -2.32 |
| Myl12b    | Myosin regulatory light chain 12B                           | 1.38 | -2.70 |
| Rpl14     | 60S ribosomal protein L14                                   | 0.78 | -3.68 |
| Adh6a     | Aldehydedehydrogenase 6a                                    | 2.56 | -4.90 |
| Fgg       | Fibrinogen gamma chain                                      | 2.00 | -6.46 |
